# Supplementary material for: Structural, optical and charge generation properties of chalcostibite and tetrahedrite copper antimony sulfide thin films prepared from metal xanthates
Source: Royal Society of Chemistry journal article supplement (doi:10.1039/c5ta05777a), 2015-01-01
Supplement: c5ta05777a1.pdf [file c5ta05777a1.pdf]

## Supplementary Information

### Structural, optical and charge generation properties of Chalcostibite and Tetrahedrite copper antimony sulfide thin films prepared from metal xanthates

Thomas Rath, Andrew J. MacLachlan, Michael D. Brown, Saif A. Haque

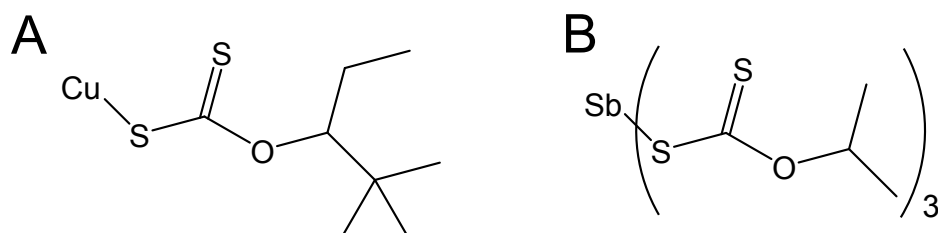

**Fig. S1** Chemical structures of the used metal xanthates: (A) copper (I) O-2,2-dimethylpentan-3-yl dithiocarbonate, (B) antimony (III) O-propan-2-yl dithiocarbonate.

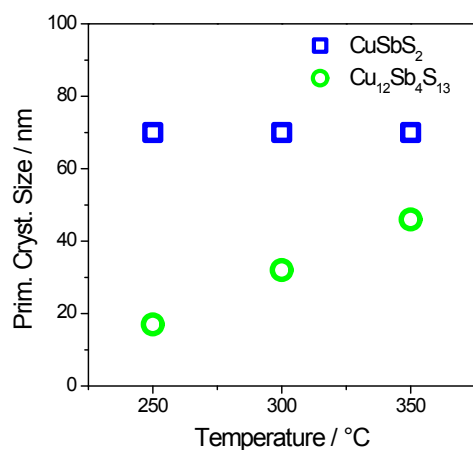

**Fig. S2** Primary crystallite sizes of CuSbS<sub>2</sub> and Cu<sub>12</sub>Sb<sub>4</sub>S<sub>13</sub> thin films prepared at different temperatures estimated using Scherrer formula (corresponding XRD patterns are presented in Fig. 1).

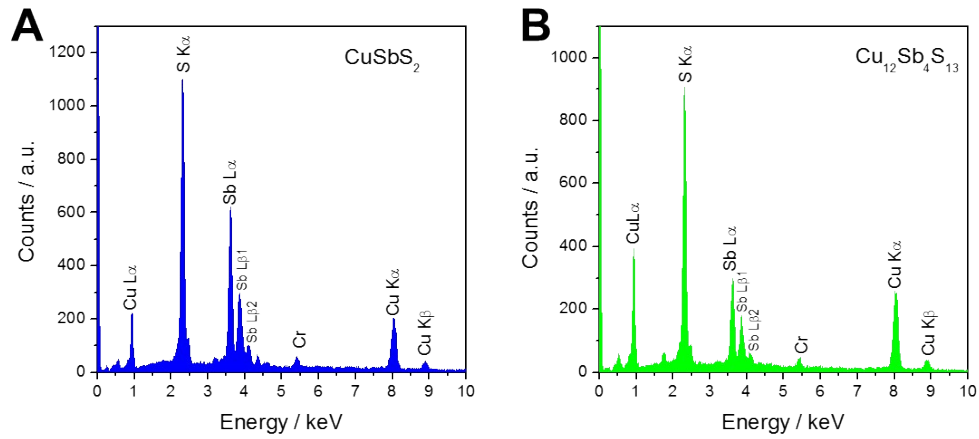

**Fig. S3** EDX spectra of Chalcostibite (A) and Tetrahedrite (B) layers annealed at 300 °C. The peaks assigned to chromium stem from a thin film of chromium sputtered on the samples to prevent electrical charging during SEM-EDX characterisation.

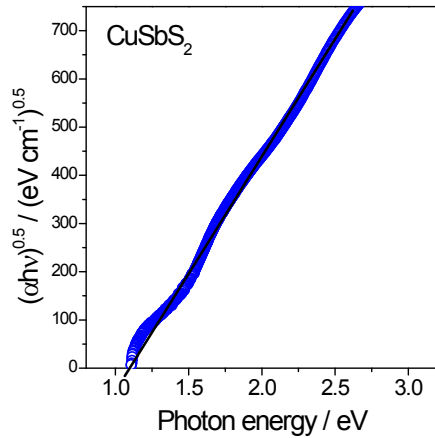

**Fig. S4** Tauc plot to determine the indirect band gap of the prepared Chalcostibite film.

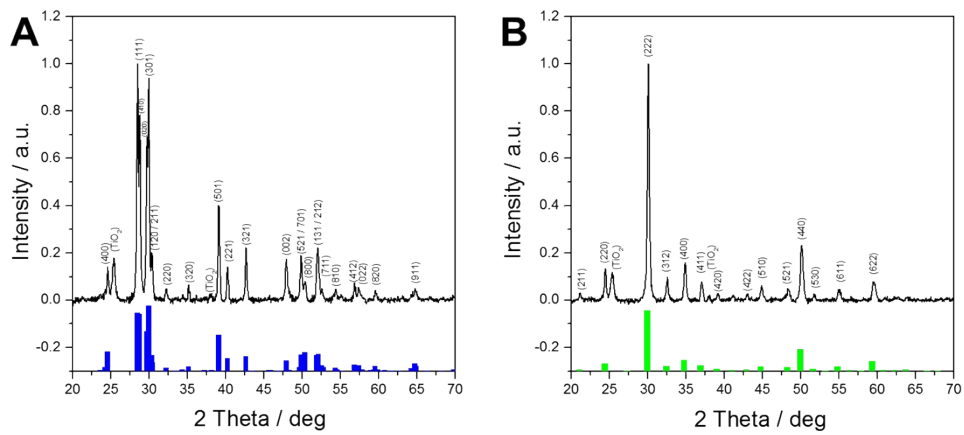

**Fig. S5** XRD patterns of  $\text{CuSbS}_2$  and  $\text{Cu}_{12}\text{Sb}_4\text{S}_{13}$  thin films prepared on mesoporous  $\text{TiO}_2$  layers. The main peaks in the patterns stemming from  $\text{CuSbS}_2$  or  $\text{Cu}_{12}\text{Sb}_4\text{S}_{13}$ , respectively, are labelled with their Miller indices (reference patterns:  $\text{CuSbS}_2$  PDF 00-044-1417;  $\text{Cu}_{12}\text{Sb}_4\text{S}_{13}$  PDF 01-088-0282). The peaks originating from the mesoporous  $\text{TiO}_2$  film are also indicated in the graph.

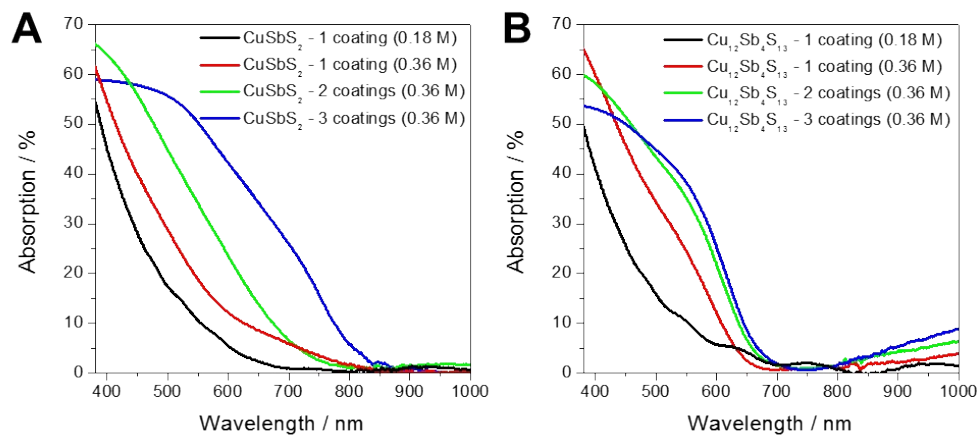

**Fig. S6** UV-VIS spectra of  $\text{CuSbS}_2$  and  $\text{Cu}_{12}\text{Sb}_4\text{S}_{13}$  thin films on mesoporous  $\text{TiO}_2$  layers. The films were prepared using two different concentrations of the metal xanthates in the precursor solutions (0.18 and 0.36 M) and different numbers of coating and annealing steps. The optical density at 450 nm of the films prepared using a 0.36 M precursor solution is comparable to a 60 nm film of  $\text{CuSbS}_2$  and  $\text{Cu}_{12}\text{Sb}_4\text{S}_{13}$  on a planar glass substrate.
